# Supplementary material for: Novel WDR72 Mutations Causing Hypomaturation Amelogenesis Imperfecta
Source: J Pers Med. 2023 Feb 14;13(2):326. doi: 10.3390/jpm13020326 (PMC9965932; doi:10.3390/jpm13020326)
Supplement: Supplementary file 1 [file jpm-13-00326-s001.zip › jpm-2204323-supplementary.pdf]

# Novel *WDR72* Mutations Causing Hypomaturation Amelogenesis Imperfecta

Youn Jung Kim<sup>1</sup>, Hong Zhang<sup>2</sup>, Yejin Lee<sup>1</sup>, Figen Seymen<sup>3</sup>, Mine Koruyucu<sup>4</sup>, Yelda Kasimoglu<sup>4</sup>, James P. Simmer<sup>2</sup>, Jan C.-C. Hu<sup>2</sup>, Jung-Wook Kim<sup>1,5\*</sup>

<sup>1</sup>Department of Pediatric Dentistry & Dental Research Institute  
School of Dentistry, Seoul National University, Seoul, Korea.

<sup>2</sup>Department of Biologic and Materials Sciences, School of Dentistry  
University of Michigan, Ann Arbor, MI, USA.

<sup>3</sup>Department of Paediatric Dentistry, Faculty of Dentistry  
Altinbas University, Istanbul, Turkey.

<sup>4</sup>Department of Paediatric Dentistry, Faculty of Dentistry  
Istanbul University, Istanbul, Turkey.

<sup>5</sup>Department of Molecular Genetics & Dental Research Institute  
School of Dentistry, Seoul National University, Seoul, Korea.

## \*Correspondence to:

Jung-Wook Kim, D.D.S., M.S.D, Ph.D.  
Department of Molecular Genetics  
Department of Pediatric Dentistry & Dental Research Institute  
School of Dentistry, Seoul National University  
101 Daehak-ro, Jongno-gu, Seoul, 03080, Korea  
Tel: +82-2-2072-2639, Fax: +82-2-744-3599  
E-mail: pedoman@snu.ac.kr

**Table S1. Statistics for exome sequencing.**

| Sample   |       | Total reads | Mapping rate (%) | Median target coverage | Coverage of target region (%) | Fraction of target covered with at least |      |
|----------|-------|-------------|------------------|------------------------|-------------------------------|------------------------------------------|------|
|          |       |             |                  |                        |                               | 20X                                      | 10X  |
| Family 1 | IV:4  | 72,646,317  | 98.2             | 70                     | 96.4                          | 91.7                                     | 95.0 |
| Family 2 | IV:2  | 121,948,763 | 99.1             | 91                     | 96.2                          | 93.2                                     | 95.1 |
| Family 3 | III:3 | 62,823,866  | 97.7             | 59                     | 98.7                          | 93.7                                     | 97.7 |
|          | III:4 | 70,252,242  | 97.7             | 63                     | 98.6                          | 96.6                                     | 98.1 |
|          | IV:1  | 45,215,908  | 98.1             | 39                     | 98.6                          | 87.6                                     | 97.2 |
| Family 4 | III:1 | 101,299,742 | 98.7             | 91                     | 98.8                          | 97.8                                     | 98.3 |
|          | III:2 | 78,607,702  | 98.8             | 73                     | 98.7                          | 97.0                                     | 97.9 |
|          | IV:1  | 95,540,376  | 99.2             | 89                     | 98.7                          | 97.6                                     | 98.1 |
